# Supplementary material for: Risk factors for intensive care admission and death amongst children and young people admitted to hospital with COVID-19 and PIMS-TS in England during the first pandemic year
Source: bioRxiv or medRxiv preprint supplement (doi:10.1101/2021.07.01.21259785), 2021-07-05
Supplement: Supplementary file [file media-2.pdf]

| exposure                      | exposurevalue                            | Cohort                         | observations | Odds Ratios |       |                     |       | Predicted probabilities |                     |       |       |       |      |  |  |
|-------------------------------|------------------------------------------|--------------------------------|--------------|-------------|-------|---------------------|-------|-------------------------|---------------------|-------|-------|-------|------|--|--|
|                               |                                          |                                |              | value       | lower | upper               | p     | value                   | lower               | upper | p     |       |      |  |  |
| Any comorbidity               |                                          | COVID-19                       | 6338         |             |       |                     |       |                         |                     |       |       |       |      |  |  |
|                               |                                          | COVID-19                       |              | 11.59       | 7.21  | 18.62               | 0.00  |                         |                     |       |       |       |      |  |  |
|                               |                                          | COVID-19                       |              |             |       |                     |       | absolute value          | 7.45                | 6.41  | 8.49  | 0.00  |      |  |  |
|                               |                                          | COVID-19                       |              |             |       |                     |       | absolute difference     | 6.75                | 5.64  | 7.86  | 0.00  |      |  |  |
|                               |                                          | PIMS-TS                        | 710          | 4.53        | 3.03  | 6.78                | 0.00  |                         |                     |       |       |       |      |  |  |
|                               |                                          | PIMS-TS                        |              |             |       |                     |       | absolute value          | 53.86               | 49.50 | 58.22 | 0.00  |      |  |  |
|                               |                                          | PIMS-TS                        |              |             |       |                     |       | absolute difference     | 28.36               | 21.11 | 35.60 | 0.00  |      |  |  |
|                               |                                          | Other pandemic year admissions | 463371       | 23.42       | 20.92 | 26.23               | 0.00  |                         |                     |       |       |       |      |  |  |
|                               |                                          | Other pandemic year admissions |              |             |       |                     |       | absolute value          | 2.67                | 2.58  | 2.75  | 0.00  |      |  |  |
|                               |                                          | Other pandemic year admissions |              |             |       |                     |       | absolute difference     | 2.55                | 2.46  | 2.63  | 0.00  |      |  |  |
|                               |                                          | All admissions 2019/20         | 771357       | 13.78       | 12.76 | 14.88               | 0.00  |                         |                     |       |       |       |      |  |  |
|                               |                                          | All admissions 2019/20         |              |             |       |                     |       | absolute value          | 2.17                | 2.11  | 2.23  | 0.00  |      |  |  |
|                               |                                          | All admissions 2019/20         |              |             |       |                     |       | absolute difference     | 2.01                | 1.95  | 2.07  | 0.00  |      |  |  |
|                               |                                          | Influenza admissions 2019/20   | 6968         | 6.03        | 4.04  | 9.01                | 0.00  |                         |                     |       |       |       |      |  |  |
| Influenza admissions 2019/20  |                                          |                                |              |             |       | absolute value      | 4.38  | 3.63                    | 5.13                | 0.00  |       |       |      |  |  |
| Influenza admissions 2019/20  |                                          |                                |              |             |       | absolute difference | 3.62  | 2.82                    | 4.42                | 0.00  |       |       |      |  |  |
| Number of body systems        | 1 body system                            | COVID-19                       | 6338         | 4.14        | 2.34  | 7.34                | 0.00  |                         |                     |       |       |       |      |  |  |
|                               |                                          | COVID-19                       |              |             |       |                     |       | absolute value          | 2.70                | 1.79  | 3.61  | 0.00  |      |  |  |
|                               |                                          | COVID-19                       |              |             |       |                     |       | absolute difference     | 2.03                | 1.06  | 3.00  | 0.00  |      |  |  |
|                               |                                          | COVID-19                       | 6338         | 20.07       | 12.13 | 33.22               | 0.00  |                         |                     |       |       |       |      |  |  |
|                               |                                          | COVID-19                       |              |             |       |                     |       | absolute value          | 11.58               | 9.80  | 13.36 | 0.00  |      |  |  |
|                               |                                          | COVID-19                       |              |             |       |                     |       | absolute difference     | 10.91               | 9.06  | 12.76 | 0.00  |      |  |  |
|                               | More than 1 body system                  | PIMS-TS                        | 710          | 2.59        | 1.61  | 4.15                | 0.00  |                         |                     |       |       |       |      |  |  |
|                               |                                          | PIMS-TS                        |              |             |       |                     |       | absolute value          | 42.63               | 35.95 | 49.31 | 0.00  |      |  |  |
|                               |                                          | PIMS-TS                        |              |             |       |                     |       | absolute difference     | 17.39               | 8.72  | 26.06 | 0.00  |      |  |  |
|                               |                                          | PIMS-TS                        | 710          | 6.93        | 4.42  | 10.88               | 0.00  |                         |                     |       |       |       |      |  |  |
|                               |                                          | PIMS-TS                        |              |             |       |                     |       | absolute value          | 62.14               | 56.41 | 67.87 | 0.00  |      |  |  |
|                               |                                          | PIMS-TS                        |              |             |       |                     |       | absolute difference     | 36.90               | 28.68 | 45.11 | 0.00  |      |  |  |
|                               | 1 body system                            | Other pandemic year admissions | 463371       | 9.66        | 8.52  | 10.96               | 0.00  |                         |                     |       |       |       |      |  |  |
|                               |                                          | Other pandemic year admissions |              |             |       |                     |       | absolute value          | 1.10                | 1.04  | 1.17  | 0.00  |      |  |  |
|                               |                                          | Other pandemic year admissions |              |             |       |                     |       | absolute difference     | 0.99                | 0.92  | 1.06  | 0.00  |      |  |  |
|                               |                                          | Other pandemic year admissions | 463371       | 48.58       | 43.14 | 54.71               | 0.00  |                         |                     |       |       |       |      |  |  |
|                               |                                          | Other pandemic year admissions |              |             |       |                     |       | absolute value          | 5.11                | 4.92  | 5.29  | 0.00  |      |  |  |
|                               |                                          | Other pandemic year admissions |              |             |       |                     |       | absolute difference     | 4.99                | 4.80  | 5.18  | 0.00  |      |  |  |
|                               | 1 body system                            | All admissions 2019/20         | 771357       | 5.73        | 5.24  | 6.27                | 0.00  |                         |                     |       |       |       |      |  |  |
|                               |                                          | All admissions 2019/20         |              |             |       |                     |       | absolute value          | 0.91                | 0.86  | 0.96  | 0.00  |      |  |  |
|                               |                                          | All admissions 2019/20         |              |             |       |                     |       | absolute difference     | 0.75                | 0.70  | 0.80  | 0.00  |      |  |  |
|                               |                                          | All admissions 2019/20         | 771357       | 27.58       | 25.45 | 29.89               | 0.00  |                         |                     |       |       |       |      |  |  |
|                               |                                          | All admissions 2019/20         |              |             |       |                     |       | absolute value          | 4.13                | 4.00  | 4.26  | 0.00  |      |  |  |
|                               |                                          | All admissions 2019/20         |              |             |       |                     |       | absolute difference     | 3.97                | 3.84  | 4.09  | 0.00  |      |  |  |
|                               | More than 1 body system                  | Influenza admissions 2019/20   | 6968         | 2.82        | 1.68  | 4.72                | 0.00  |                         |                     |       |       |       |      |  |  |
|                               |                                          | Influenza admissions 2019/20   |              |             |       |                     |       | absolute value          | 2.09                | 1.34  | 2.84  | 0.00  |      |  |  |
|                               |                                          | Influenza admissions 2019/20   |              |             |       |                     |       | absolute difference     | 1.33                | 0.54  | 2.13  | 0.00  |      |  |  |
|                               |                                          | Influenza admissions 2019/20   | 6968         | 9.18        | 6.05  | 13.92               | 0.00  |                         |                     |       |       |       |      |  |  |
|                               |                                          | Influenza admissions 2019/20   |              |             |       |                     |       | absolute value          | 6.45                | 5.21  | 7.70  | 0.00  |      |  |  |
|                               |                                          | Influenza admissions 2019/20   |              |             |       |                     |       | absolute difference     | 5.70                | 4.42  | 6.98  | 0.00  |      |  |  |
|                               | Hitting or non life limiting comorbidity | Non life limiting comorbidity  | COVID-19     | 6338        | 5.53  | 3.29                | 9.31  | 0.00                    |                     |       |       |       |      |  |  |
|                               |                                          |                                | COVID-19     |             |       |                     |       |                         | absolute value      | 3.72  | 2.85  | 4.59  | 0.00 |  |  |
|                               |                                          |                                | COVID-19     |             |       |                     |       |                         | absolute difference | 3.02  | 2.07  | 3.97  | 0.00 |  |  |
|                               |                                          |                                | COVID-19     | 6338        | 26.08 | 15.88               | 42.84 | 0.00                    |                     |       |       |       |      |  |  |
|                               |                                          |                                | COVID-19     |             |       |                     |       |                         | absolute value      | 15.06 | 12.66 | 17.45 | 0.00 |  |  |
|                               |                                          |                                | COVID-19     |             |       |                     |       |                         | absolute difference | 14.36 | 11.92 | 16.80 | 0.00 |  |  |
| Life limiting comorbidity     |                                          | PIMS-TS                        | 710          | 3.69        | 2.41  | 5.64                | 0.00  |                         |                     |       |       |       |      |  |  |
|                               |                                          | PIMS-TS                        |              |             |       |                     |       | absolute value          | 49.92               | 44.67 | 55.18 | 0.00  |      |  |  |
|                               |                                          | PIMS-TS                        |              |             |       |                     |       | absolute difference     | 24.49               | 16.69 | 32.28 | 0.00  |      |  |  |
|                               |                                          | PIMS-TS                        | 710          | 7.18        | 4.20  | 12.27               | 0.00  |                         |                     |       |       |       |      |  |  |
|                               |                                          | PIMS-TS                        |              |             |       |                     |       | absolute value          | 62.97               | 55.05 | 70.89 | 0.00  |      |  |  |
|                               |                                          | PIMS-TS                        |              |             |       |                     |       | absolute difference     | 37.54               | 27.70 | 47.38 | 0.00  |      |  |  |
| Non life limiting comorbidity |                                          | Other pandemic year admissions | 463371       | 11.35       | 10.07 | 12.80               | 0.00  |                         |                     |       |       |       |      |  |  |
|                               |                                          | Other pandemic year admissions |              |             |       |                     |       | absolute value          | 1.32                | 1.26  | 1.39  | 0.00  |      |  |  |
|                               |                                          | Other pandemic year admissions |              |             |       |                     |       | absolute difference     | 1.20                | 1.13  | 1.27  | 0.00  |      |  |  |
|                               |                                          | Other pandemic year admissions | 463371       | 72.13       | 64.01 | 81.27               | 0.00  |                         |                     |       |       |       |      |  |  |
|                               |                                          | Other pandemic year admissions |              |             |       |                     |       | absolute value          | 7.46                | 7.17  | 7.75  | 0.00  |      |  |  |
|                               |                                          | Other pandemic year admissions |              |             |       |                     |       | absolute difference     | 7.34                | 7.05  | 7.63  | 0.00  |      |  |  |
| Life limiting comorbidity     |                                          | All admissions 2019/20         | 771357       | 6.47        | 5.95  | 7.04                | 0.00  |                         |                     |       |       |       |      |  |  |
|                               |                                          | All admissions 2019/20         |              |             |       |                     |       | absolute value          | 1.04                | 1.00  | 1.09  | 0.00  |      |  |  |
|                               |                                          | All admissions 2019/20         |              |             |       |                     |       | absolute difference     | 0.88                | 0.83  | 0.93  | 0.00  |      |  |  |
|                               |                                          | All admissions 2019/20         | 771357       | 43.96       | 40.53 | 47.67               | 0.00  |                         |                     |       |       |       |      |  |  |
|                               |                                          | All admissions 2019/20         |              |             |       |                     |       | absolute value          | 6.45                | 6.24  | 6.65  | 0.00  |      |  |  |
|                               |                                          | All admissions 2019/20         |              |             |       |                     |       | absolute difference     | 6.28                | 6.07  | 6.49  | 0.00  |      |  |  |
| Non life limiting comorbidity |                                          | Influenza admissions 2019/20   | 6968         | 2.92        | 1.82  | 4.68                | 0.00  |                         |                     |       |       |       |      |  |  |
|                               |                                          | Influenza admissions 2019/20   |              |             |       |                     |       | absolute value          | 2.16                | 1.52  | 2.81  | 0.00  |      |  |  |
|                               |                                          | Influenza admissions 2019/20   |              |             |       |                     |       | absolute difference     | 1.41                | 0.71  | 2.11  | 0.00  |      |  |  |
|                               |                                          | Influenza admissions 2019/20   | 6968         | 13.04       | 8.52  | 19.95               | 0.00  |                         |                     |       |       |       |      |  |  |
|                               |                                          | Influenza admissions 2019/20   |              |             |       |                     |       | absolute value          | 8.89                | 7.07  | 10.71 | 0.00  |      |  |  |
|                               |                                          | Influenza admissions 2019/20   |              |             |       |                     |       | absolute difference     | 8.14                | 6.29  | 9.98  | 0.00  |      |  |  |
| Respiratory comorbidity       |                                          |                                | COVID-19     | 4101        | 19.03 | 10.98               | 32.98 | 0.00                    |                     |       |       |       |      |  |  |
|                               |                                          |                                | COVID-19     |             |       |                     |       |                         | absolute value      | 11.88 | 9.13  | 14.63 | 0.00 |  |  |
|                               |                                          |                                | COVID-19     |             |       |                     |       |                         | absolute difference | 11.16 | 8.34  | 13.98 | 0.00 |  |  |
|                               |                                          |                                | PIMS-TS      | 361         | 4.59  | 2.43                | 8.69  | 0.00                    |                     |       |       |       |      |  |  |
|                               |                                          |                                | PIMS-TS      |             |       |                     |       |                         | absolute value      | 50.25 | 40.12 | 60.38 | 0.00 |  |  |
|                               |                                          |                                | PIMS-TS      |             |       |                     |       |                         | absolute difference | 26.39 | 14.48 | 38.29 | 0.00 |  |  |
|                               | Other pandemic year admissions           |                                | 312844       | 42.44       | 37.26 | 48.35               | 0.00  |                         |                     |       |       |       |      |  |  |
|                               | Other pandemic year admissions           |                                |              |             |       |                     |       | absolute value          | 5.01                | 4.74  | 5.29  | 0.00  |      |  |  |
|                               | Other pandemic year admissions           |                                |              |             |       |                     |       | absolute difference     | 4.88                | 4.61  | 5.16  | 0.00  |      |  |  |
|                               | All admissions 2019/20                   |                                | 548982       | 26.01       | 23.82 | 28.41               | 0.00  |                         |                     |       |       |       |      |  |  |
|                               | All admissions 2019/20                   |                                |              |             |       |                     |       | absolute value          | 4.10                | 3.93  | 4.27  | 0.00  |      |  |  |
|                               | All admissions 2019/20                   |                                |              |             |       |                     |       | absolute difference     | 3.93                | 3.76  | 4.11  | 0.00  |      |  |  |
|                               | Influenza admissions 2019/20             |                                | 5187         | 12.65       | 8.06  | 19.83               | 0.00  |                         |                     |       |       |       |      |  |  |
|                               | Influenza admissions 2019/20             |                                |              |             |       |                     |       | absolute value          | 8.34                | 6.59  | 10.10 | 0.00  |      |  |  |
| Influenza admissions 2019/20  |                                          |                                |              |             |       | absolute difference | 7.61  | 5.82                    | 9.40                | 0.00  |       |       |      |  |  |
| Cardiovascular comorbidity    |                                          | COVID-19                       | 3961         | 27.10       | 16.48 | 44.59               | 0.00  |                         |                     |       |       |       |      |  |  |
|                               |                                          | COVID-19                       |              |             |       |                     |       | absolute value          | 16.17               | 13.42 | 18.91 | 0.00  |      |  |  |
|                               |                                          | COVID-19                       |              |             |       |                     |       | absolute difference     | 15.43               | 12.64 | 18.22 | 0.00  |      |  |  |
|                               |                                          | PIMS-TS                        | 542          | 6.36        | 4.02  | 10.06               | 0.00  |                         |                     |       |       |       |      |  |  |
|                               |                                          | PIMS-TS                        |              |             |       |                     |       | absolute value          | 57.76               | 52.26 | 63.26 | 0.00  |      |  |  |
|                               |                                          | PIMS-TS                        |              |             |       |                     |       | absolute difference     | 33.42               | 25.50 | 41.34 | 0.00  |      |  |  |
|                               |                                          | Other pandemic year admissions | 289180       | 65.72       | 58.35 | 74.03               | 0.00  |                         |                     |       |       |       |      |  |  |
|                               |                                          | Other pandemic year admissions |              |             |       |                     |       | absolute value          | 7.91                | 7.60  | 8.22  | 0.00  |      |  |  |
|                               |                                          | Other pandemic year admissions |              |             |       |                     |       | absolute difference     | 7.77                | 7.46  | 8.08  | 0.00  |      |  |  |
|                               |                                          | All admissions 2019/20         | 489665       | 39.48       | 36.37 | 42.85               | 0.00  |                         |                     |       |       |       |      |  |  |
|                               |                                          | All admissions 2019/20         |              |             |       |                     |       | absolute value          | 6.50                | 6.27  | 6.72  | 0.00  |      |  |  |
|                               |                                          | All admissions 2019/20         |              |             |       |                     |       | absolute difference     | 6.31                | 6.09  | 6.54  | 0.00  |      |  |  |
|                               |                                          | Influenza admissions 2019/20   | 4690         | 10.08       | 6.34  | 16.01               | 0.00  |                         |                     |       |       |       |      |  |  |
|                               |                                          | Influenza admissions 2019/20   |              |             |       |                     |       | absolute value          | 7.06                | 5.23  | 8.89  | 0.00  |      |  |  |
| Influenza admissions 2019/20  |                                          |                                |              |             |       | absolute difference | 6.29  | 4.43                    | 8.14                | 0.00  |       |       |      |  |  |
| Neurological comorbidity      |                                          | COVID-19                       | 4171         | 20.97       | 12.52 | 35.11               | 0.00  |                         |                     |       |       |       |      |  |  |
|                               |                                          | COVID-19                       |              |             |       |                     |       | absolute value          | 13.04               | 10.58 | 15.51 | 0.00  |      |  |  |
|                               |                                          | COVID-19                       |              |             |       |                     |       | absolute difference     | 12.31               | 9.78  | 14.84 | 0.00  |      |  |  |
|                               |                                          | PIMS-TS                        | 351          | 4.93        | 2.58  | 9.41                | 0.00  |                         |                     |       |       |       |      |  |  |
|                               |                                          | PIMS-TS                        |              |             |       |                     |       | absolute value          | 51.17               | 41.05 | 61.30 | 0.00  |      |  |  |
|                               |                                          | PIMS-TS                        |              |             |       |                     |       | absolute difference     | 27.47               | 15.74 | 39.21 | 0.00  |      |  |  |
|                               |                                          | Other pandemic year admissions | 315855       | 39.70       | 35.16 | 44.82               | 0.00  |                         |                     |       |       |       |      |  |  |
|                               |                                          | Other pandemic year admissions |              |             |       |                     |       | absolute value          | 4.90                | 4.67  | 5.12  | 0.00  |      |  |  |
|                               |                                          | Other pandemic year admissions |              |             |       |                     |       | absolute difference     | 4.76                | 4.54  | 4.99  | 0.00  |      |  |  |
|                               |                                          | All admissions 2019/20         | 533799       | 23.13       | 21.34 | 25.08               | 0.00  |                         |                     |       |       |       |      |  |  |
|                               |                                          | All admissions 2019/20         |              |             |       |                     |       |                         |                     |       |       |       |      |  |  |

|                                   |                                |        |       |       |        |                     |                     |       |        |       |      |  |
|-----------------------------------|--------------------------------|--------|-------|-------|--------|---------------------|---------------------|-------|--------|-------|------|--|
|                                   | Influenza admissions 2019/20   | 4955   | 11.94 | 7.76  | 18.39  | 0.00                |                     |       |        |       |      |  |
|                                   | Influenza admissions 2019/20   |        |       |       |        |                     | absolute value      | 8.24  | 6.49   | 9.99  | 0.00 |  |
|                                   | Influenza admissions 2019/20   |        |       |       |        |                     | absolute difference | 7.48  | 5.70   | 9.25  | 0.00 |  |
| Cancer/Haematological comorbidity | COVID-19                       | 3930   | 16.03 | 9.06  | 28.35  | 0.00                |                     |       |        |       |      |  |
|                                   | COVID-19                       |        |       |       |        |                     | absolute value      | 10.43 | 7.70   | 13.16 | 0.00 |  |
|                                   | COVID-19                       |        |       |       |        |                     | absolute difference | 9.70  | 6.90   | 12.50 | 0.00 |  |
|                                   | PIMS-TS                        | 441    | 7.64  | 4.55  | 12.82  | 0.00                |                     |       |        |       |      |  |
|                                   | PIMS-TS                        |        |       |       |        |                     | absolute value      | 63.25 | 55.99  | 70.50 | 0.00 |  |
|                                   | PIMS-TS                        |        |       |       |        |                     | absolute difference | 37.84 | 28.19  | 47.49 | 0.00 |  |
|                                   | Other pandemic year admissions | 286006 | 43.31 | 37.56 | 49.95  | 0.00                |                     |       |        |       |      |  |
|                                   | Other pandemic year admissions |        |       |       |        |                     | absolute value      | 5.43  | 5.04   | 5.83  | 0.00 |  |
|                                   | Other pandemic year admissions |        |       |       |        |                     | absolute difference | 5.30  | 4.90   | 5.69  | 0.00 |  |
|                                   | All admissions 2019/20         | 484299 | 27.85 | 25.31 | 30.63  | 0.00                |                     |       |        |       |      |  |
|                                   | All admissions 2019/20         |        |       |       |        |                     | absolute value      | 4.67  | 4.42   | 4.93  | 0.00 |  |
|                                   | All admissions 2019/20         |        |       |       |        |                     | absolute difference | 4.49  | 4.24   | 4.75  | 0.00 |  |
|                                   | Influenza admissions 2019/20   | 4654   | 8.13  | 4.82  | 13.71  | 0.00                |                     |       |        |       |      |  |
| Influenza admissions 2019/20      |                                |        |       |       |        | absolute value      | 5.72                | 3.82  | 7.61   | 0.00  |      |  |
| Influenza admissions 2019/20      |                                |        |       |       |        | absolute difference | 4.96                | 3.04  | 6.88   | 0.00  |      |  |
| Neurological and cardiovascular   | COVID-19                       | 3456   | 35.87 | 20.57 | 62.58  | 0.00                |                     |       |        |       |      |  |
|                                   | COVID-19                       |        |       |       |        |                     | absolute value      | 20.08 | 15.64  | 24.53 | 0.00 |  |
|                                   | COVID-19                       |        |       |       |        |                     | absolute difference | 19.34 | 14.84  | 23.83 | 0.00 |  |
|                                   | PIMS-TS                        | 323    | 8.00  | 3.50  | 18.28  | 0.00                |                     |       |        |       |      |  |
|                                   | PIMS-TS                        |        |       |       |        |                     | absolute value      | 59.10 | 45.59  | 72.62 | 0.00 |  |
|                                   | PIMS-TS                        |        |       |       |        |                     | absolute difference | 36.14 | 21.33  | 50.96 | 0.00 |  |
|                                   | Other pandemic year admissions | 265479 | 80.64 | 70.57 | 92.15  | 0.00                |                     |       |        |       |      |  |
|                                   | Other pandemic year admissions |        |       |       |        |                     | absolute value      | 9.68  | 9.14   | 10.21 | 0.00 |  |
|                                   | Other pandemic year admissions |        |       |       |        |                     | absolute difference | 9.54  | 9.00   | 10.07 | 0.00 |  |
|                                   | All admissions 2019/20         | 454734 | 48.83 | 44.64 | 53.42  | 0.00                |                     |       |        |       |      |  |
|                                   | All admissions 2019/20         |        |       |       |        |                     | absolute value      | 8.03  | 7.66   | 8.40  | 0.00 |  |
|                                   | All admissions 2019/20         |        |       |       |        |                     | absolute difference | 7.85  | 7.48   | 8.22  | 0.00 |  |
|                                   | Influenza admissions 2019/20   | 4289   | 14.21 | 8.49  | 23.80  | 0.00                |                     |       |        |       |      |  |
| Influenza admissions 2019/20      |                                |        |       |       |        | absolute value      | 9.47                | 6.53  | 12.40  | 0.00  |      |  |
| Influenza admissions 2019/20      |                                |        |       |       |        | absolute difference | 8.69                | 5.75  | 11.64  | 0.00  |      |  |
| Neurological and respiratory      | COVID-19                       | 3414   | 32.44 | 18.23 | 57.75  | 0.00                |                     |       |        |       |      |  |
|                                   | COVID-19                       |        |       |       |        |                     | absolute value      | 19.00 | 14.11  | 23.89 | 0.00 |  |
|                                   | COVID-19                       |        |       |       |        |                     | absolute difference | 18.26 | 13.32  | 23.20 | 0.00 |  |
|                                   | PIMS-TS                        | 288    | 10.51 | 3.24  | 34.10  | 0.00                |                     |       |        |       |      |  |
|                                   | PIMS-TS                        |        |       |       |        |                     | absolute value      | 60.57 | 40.42  | 80.72 | 0.00 |  |
|                                   | PIMS-TS                        |        |       |       |        |                     | absolute difference | 39.12 | 18.38  | 59.87 | 0.00 |  |
|                                   | Other pandemic year admissions | 266108 | 68.90 | 59.63 | 79.61  | 0.00                |                     |       |        |       |      |  |
|                                   | Other pandemic year admissions |        |       |       |        |                     | absolute value      | 8.44  | 7.85   | 9.03  | 0.00 |  |
|                                   | Other pandemic year admissions |        |       |       |        |                     | absolute difference | 8.30  | 7.70   | 8.89  | 0.00 |  |
|                                   | All admissions 2019/20         | 459563 | 45.44 | 41.39 | 49.89  | 0.00                |                     |       |        |       |      |  |
|                                   | All admissions 2019/20         |        |       |       |        |                     | absolute value      | 7.47  | 7.09   | 7.85  | 0.00 |  |
|                                   | All admissions 2019/20         |        |       |       |        |                     | absolute difference | 7.28  | 6.90   | 7.66  | 0.00 |  |
|                                   | Influenza admissions 2019/20   | 4368   | 21.15 | 12.84 | 34.85  | 0.00                |                     |       |        |       |      |  |
| Influenza admissions 2019/20      |                                |        |       |       |        | absolute value      | 13.12               | 9.79  | 16.46  | 0.00  |      |  |
| Influenza admissions 2019/20      |                                |        |       |       |        | absolute difference | 12.36               | 9.01  | 15.71  | 0.00  |      |  |
| Respiratory and cardiovascular    | COVID-19                       | 3357   | 37.74 | 21.65 | 65.80  | 0.00                |                     |       |        |       |      |  |
|                                   | COVID-19                       |        |       |       |        |                     | absolute value      | 21.40 | 16.25  | 26.55 | 0.00 |  |
|                                   | COVID-19                       |        |       |       |        |                     | absolute difference | 20.65 | 15.47  | 25.84 | 0.00 |  |
|                                   | PIMS-TS                        | 325    | 6.63  | 3.15  | 13.96  | 0.00                |                     |       |        |       |      |  |
|                                   | PIMS-TS                        |        |       |       |        |                     | absolute value      | 52.60 | 40.04  | 65.16 | 0.00 |  |
|                                   | PIMS-TS                        |        |       |       |        |                     | absolute difference | 30.98 | 17.37  | 44.59 | 0.00 |  |
|                                   | Other pandemic year admissions | 261424 | 85.24 | 74.19 | 97.95  | 0.00                |                     |       |        |       |      |  |
|                                   | Other pandemic year admissions |        |       |       |        |                     | absolute value      | 10.20 | 9.58   | 10.82 | 0.00 |  |
|                                   | Other pandemic year admissions |        |       |       |        |                     | absolute difference | 10.06 | 9.44   | 10.68 | 0.00 |  |
|                                   | All admissions 2019/20         | 450099 | 54.69 | 49.85 | 60.01  | 0.00                |                     |       |        |       |      |  |
|                                   | All admissions 2019/20         |        |       |       |        |                     | absolute value      | 8.83  | 8.41   | 9.25  | 0.00 |  |
|                                   | All admissions 2019/20         |        |       |       |        |                     | absolute difference | 8.64  | 8.23   | 9.06  | 0.00 |  |
|                                   | Influenza admissions 2019/20   | 4293   | 17.06 | 10.22 | 28.50  | 0.00                |                     |       |        |       |      |  |
| Influenza admissions 2019/20      |                                |        |       |       |        | absolute value      | 11.06               | 7.84  | 14.29  | 0.00  |      |  |
| Influenza admissions 2019/20      |                                |        |       |       |        | absolute difference | 10.29               | 7.05  | 13.53  | 0.00  |      |  |
| Epilepsy                          | COVID-19                       | 3316   | 22.99 | 12.47 | 42.39  | 0.00                |                     |       |        |       |      |  |
|                                   | COVID-19                       |        |       |       |        |                     | absolute value      | 14.43 | 9.58   | 19.29 | 0.00 |  |
|                                   | COVID-19                       |        |       |       |        |                     | absolute difference | 13.67 | 8.77   | 18.58 | 0.00 |  |
|                                   | PIMS-TS                        | 270    | 21.17 | 2.98  | 150.40 | 0.00                |                     |       |        |       |      |  |
|                                   | PIMS-TS                        |        |       |       |        |                     | absolute value      | 70.17 | 40.48  | 99.86 | 0.00 |  |
|                                   | PIMS-TS                        |        |       |       |        |                     | absolute difference | 50.43 | 20.37  | 80.50 | 0.00 |  |
|                                   | Other pandemic year admissions | 262103 | 50.88 | 43.85 | 59.04  | 0.00                |                     |       |        |       |      |  |
|                                   | Other pandemic year admissions |        |       |       |        |                     | absolute value      | 6.62  | 6.00   | 7.24  | 0.00 |  |
|                                   | Other pandemic year admissions |        |       |       |        |                     | absolute difference | 6.48  | 5.86   | 7.10  | 0.00 |  |
|                                   | All admissions 2019/20         | 448138 | 38.26 | 34.55 | 42.37  | 0.00                |                     |       |        |       |      |  |
|                                   | All admissions 2019/20         |        |       |       |        |                     | absolute value      | 6.50  | 6.05   | 6.94  | 0.00 |  |
|                                   | All admissions 2019/20         |        |       |       |        |                     | absolute difference | 6.31  | 5.86   | 6.76  | 0.00 |  |
|                                   | Influenza admissions 2019/20   | 4177   | 25.55 | 14.91 | 43.79  | 0.00                |                     |       |        |       |      |  |
| Influenza admissions 2019/20      |                                |        |       |       |        | absolute value      | 15.62               | 10.93 | 20.30  | 0.00  |      |  |
| Influenza admissions 2019/20      |                                |        |       |       |        | absolute difference | 14.85               | 10.15 | 19.55  | 0.00  |      |  |
| Diabetes Mellitus                 | COVID-19                       | 2951   | 17.97 | 6.91  | 46.73  | 0.00                |                     |       |        |       |      |  |
|                                   | COVID-19                       |        |       |       |        |                     | absolute value      | 11.74 | 3.51   | 19.97 | 0.01 |  |
|                                   | COVID-19                       |        |       |       |        |                     | absolute difference | 10.96 | 2.69   | 19.22 | 0.01 |  |
|                                   | PIMS-TS                        | 260    | 14.55 | 0.69  | 306.30 | 0.09                |                     |       |        |       |      |  |
|                                   | PIMS-TS                        |        |       |       |        |                     | absolute value      | 62.21 | 10.55  | 100*  | 0.02 |  |
|                                   | PIMS-TS                        |        |       |       |        |                     | absolute difference | 42.56 | -9.24  | 94.35 | 0.11 |  |
|                                   | Other pandemic year admissions | 250458 | 45.32 | 35.79 | 57.40  | 0.00                |                     |       |        |       |      |  |
|                                   | Other pandemic year admissions |        |       |       |        |                     | absolute value      | 5.98  | 4.82   | 7.14  | 0.00 |  |
|                                   | Other pandemic year admissions |        |       |       |        |                     | absolute difference | 5.84  | 4.68   | 7.00  | 0.00 |  |
|                                   | All admissions 2019/20         | 428571 | 23.43 | 18.94 | 28.99  | 0.00                |                     |       |        |       |      |  |
|                                   | All admissions 2019/20         |        |       |       |        |                     | absolute value      | 4.13  | 3.35   | 4.91  | 0.00 |  |
|                                   | All admissions 2019/20         |        |       |       |        |                     | absolute difference | 3.94  | 3.16   | 4.72  | 0.00 |  |
|                                   | Influenza admissions 2019/20   | 3718   | 4.18  | 0.57  | 30.58  | 0.16                |                     |       |        |       |      |  |
| Influenza admissions 2019/20      |                                |        |       |       |        | absolute value      | 3.26                | 0.0*  | 9.31   | 0.29  |      |  |
| Influenza admissions 2019/20      |                                |        |       |       |        | absolute difference | 2.44                | -3.61 | 8.50   | 0.43  |      |  |
| Asthma                            | COVID-19                       | 3541   | 7.48  | 3.49  | 16.01  | 0.00                |                     |       |        |       |      |  |
|                                   | COVID-19                       |        |       |       |        |                     | absolute value      | 5.25  | 2.50   | 8.00  | 0.00 |  |
|                                   | COVID-19                       |        |       |       |        |                     | absolute difference | 4.50  | 1.67   | 7.33  | 0.00 |  |
|                                   | PIMS-TS                        | 305    | 1.92  | 0.88  | 4.17   | 0.10                |                     |       |        |       |      |  |
|                                   | PIMS-TS                        |        |       |       |        |                     | absolute value      | 32.14 | 21.61  | 42.68 | 0.00 |  |
|                                   | PIMS-TS                        |        |       |       |        |                     | absolute difference | 9.32  | -2.54  | 21.18 | 0.12 |  |
|                                   | Other pandemic year admissions | 282815 | 11.39 | 9.24  | 14.05  | 0.00                |                     |       |        |       |      |  |
|                                   | Other pandemic year admissions |        |       |       |        |                     | absolute value      | 1.51  | 1.25   | 1.77  | 0.00 |  |
|                                   | Other pandemic year admissions |        |       |       |        |                     | absolute difference | 1.37  | 1.12   | 1.63  | 0.00 |  |
|                                   | All admissions 2019/20         | 494995 | 7.97  | 6.91  | 9.20   | 0.00                |                     |       |        |       |      |  |
|                                   | All admissions 2019/20         |        |       |       |        |                     | absolute value      | 1.37  | 1.21   | 1.53  | 0.00 |  |
|                                   | All admissions 2019/20         |        |       |       |        |                     | absolute difference | 1.19  | 1.03   | 1.35  | 0.00 |  |
|                                   | Influenza admissions 2019/20   | 4540   | 4.18  | 1.95  | 8.94   | 0.00                |                     |       |        |       |      |  |
| Influenza admissions 2019/20      |                                |        |       |       |        | absolute value      | 3.00                | 1.18  | 4.82   | 0.00  |      |  |
| Influenza admissions 2019/20      |                                |        |       |       |        | absolute difference | 2.26                | 0.40  | 4.12   | 0.02  |      |  |
| Sickle Cell Disease               | COVID-19                       | 2891   | 1.07  | 0.25  | 4.48   | 0.93                |                     |       |        |       |      |  |
|                                   | COVID-19                       |        |       |       |        |                     | absolute value      | 0.88  | 0.0*   | 2.01  | 0.13 |  |
|                                   | COVID-19                       |        |       |       |        |                     | absolute difference | 0.05  | -1.16  | 1.27  | 0.93 |  |
|                                   | PIMS-TS                        | 262    | 9.45  | 0.44  | 202.10 | 0.15                |                     |       |        |       |      |  |
|                                   | PIMS-TS                        |        |       |       |        |                     | absolute value      | 56.02 | 0.98   | 100*  | 0.05 |  |
|                                   | PIMS-TS                        |        |       |       |        |                     | absolute difference | 36.15 | -19.02 | 91.32 | 0.20 |  |
|                                   | Other pandemic year admissions | 244932 | 11.84 | 7.89  | 17.77  | 0.00                |                     |       |        |       |      |  |
|                                   | Other pandemic year admissions |        |       |       |        |                     | absolute value      | 1.70  | 1.05   | 2.35  | 0.00 |  |
|                                   | Other pandemic year admissions |        |       |       |        |                     | absolute difference | 1.55  | 0.90   | 2.20  | 0.00 |  |
|                                   | All admissions 2019/20         | 422527 | 15.36 | 11.02 | 21.40  | 0.00                |                     |       |        |       |      |  |
|                                   | All admissions 2019/20         |        |       |       |        |                     | absolute value      | 2.80  | 1.93   | 3.67  | 0.00 |  |

|            |                                |        |       |       |       |      |                     |       |       |       |      |
|------------|--------------------------------|--------|-------|-------|-------|------|---------------------|-------|-------|-------|------|
|            | All admissions 2019/20         |        |       |       |       |      | absolute difference | 2.61  | 1.74  | 3.48  | 0.00 |
|            | Influenza admissions 2019/20   | 3733   | 1.41  | 0.17  | 11.68 | 0.75 | absolute value      | 1.16  | 0.0*  | 3.51  | 0.34 |
|            | Influenza admissions 2019/20   |        |       |       |       |      | absolute difference | 0.33  | -2.04 | 2.71  | 0.78 |
| Trisomy 21 | COVID-19                       | 2990   | 34.80 | 15.75 | 76.89 | 0.00 |                     |       |       |       |      |
|            | COVID-19                       |        |       |       |       |      | absolute value      | 19.37 | 9.03  | 29.72 | 0.00 |
|            | COVID-19                       |        |       |       |       |      | absolute difference | 18.61 | 8.26  | 28.96 | 0.00 |
|            | Other pandemic year admissions | 244428 | 35.63 | 28.18 | 45.05 | 0.00 |                     |       |       |       |      |
|            | Other pandemic year admissions |        |       |       |       |      | absolute value      | 4.87  | 3.92  | 5.81  | 0.00 |
|            | Other pandemic year admissions |        |       |       |       |      | absolute difference | 4.72  | 3.78  | 5.67  | 0.00 |
|            | All admissions 2019/20         | 422074 | 29.92 | 25.02 | 35.77 | 0.00 |                     |       |       |       |      |
|            | All admissions 2019/20         |        |       |       |       |      | absolute value      | 5.26  | 4.46  | 6.06  | 0.00 |
|            | All admissions 2019/20         |        |       |       |       |      | absolute difference | 5.07  | 4.27  | 5.87  | 0.00 |
|            | Influenza admissions 2019/20   | 3723   | 10.83 | 3.60  | 32.58 | 0.00 |                     |       |       |       |      |
|            | Influenza admissions 2019/20   |        |       |       |       |      | absolute value      | 7.83  | 0.71  | 14.96 | 0.03 |
|            | Influenza admissions 2019/20   |        |       |       |       |      | absolute difference | 7.02  | -0.12 | 14.15 | 0.05 |

\*Confidence intervals for absolute predicted probability of PICU admission which exceed 100 or are lower than 0 are rounded to 100 and 0 respectively

Data are odds ratios with confidence intervals multivariable GEE models adjusted  
Predicted probabilities show absolute and relative difference in predicted probal

| for age, sex, ethnicity and IMD

bility of PICU admission by comorbidity group compared with no comorbidity
